# Supplementary material for: Controllable growth of substrate-scale 2D ReSe2 thin films and their application for molecular detection via the SERS technique
Source: Royal Society of Chemistry journal article supplement (doi:10.1039/d2cp01215d), 2022-01-01
Supplement: d2cp01215d1.pdf [file d2cp01215d1.pdf]

## Controllable growth of substrate-scale 2D ReSe<sub>2</sub> thin films and their application for molecular detection via SERS technique

Lingfeng Deng<sup>1</sup>, Xiaoying Zhang<sup>1</sup>, Liu Jun<sup>3</sup>, Aixiang Wei<sup>1,2\*</sup>, Yu ding He<sup>1</sup>, Zhen  
Liu<sup>1</sup>, Ningqi Luo<sup>1</sup>,

<sup>1</sup> Guangdong Provincial Key Laboratory of Functional Soft Condensed Matter,  
School of Integrated Circuits, Guangdong University of Technology, Guangzhou  
510006, Guangdong, China

<sup>2</sup> School of Information Science, Guangzhou Xinhua University, Dongguan 523133,  
Guangdong, China

<sup>3</sup> School of Electrical Engineering, University of South China, Hengyang 421001,  
Hunan, China

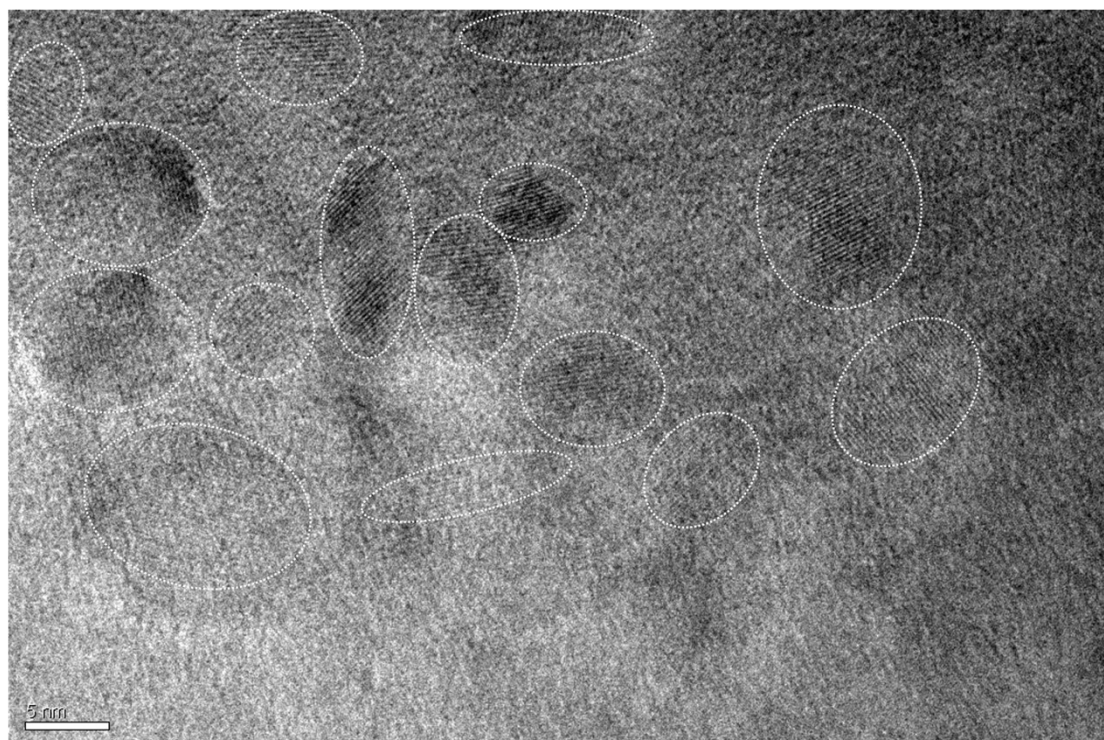

**Figure S1** HRTEM image of ReSe<sub>2</sub> films

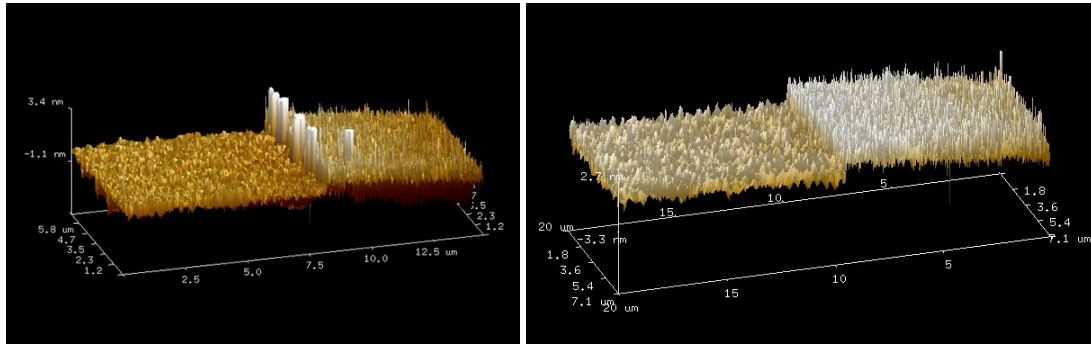

**Figure S2** AFM images of 2D ReSe<sub>2</sub> films with 2 layers (a) and 4 layers (b)

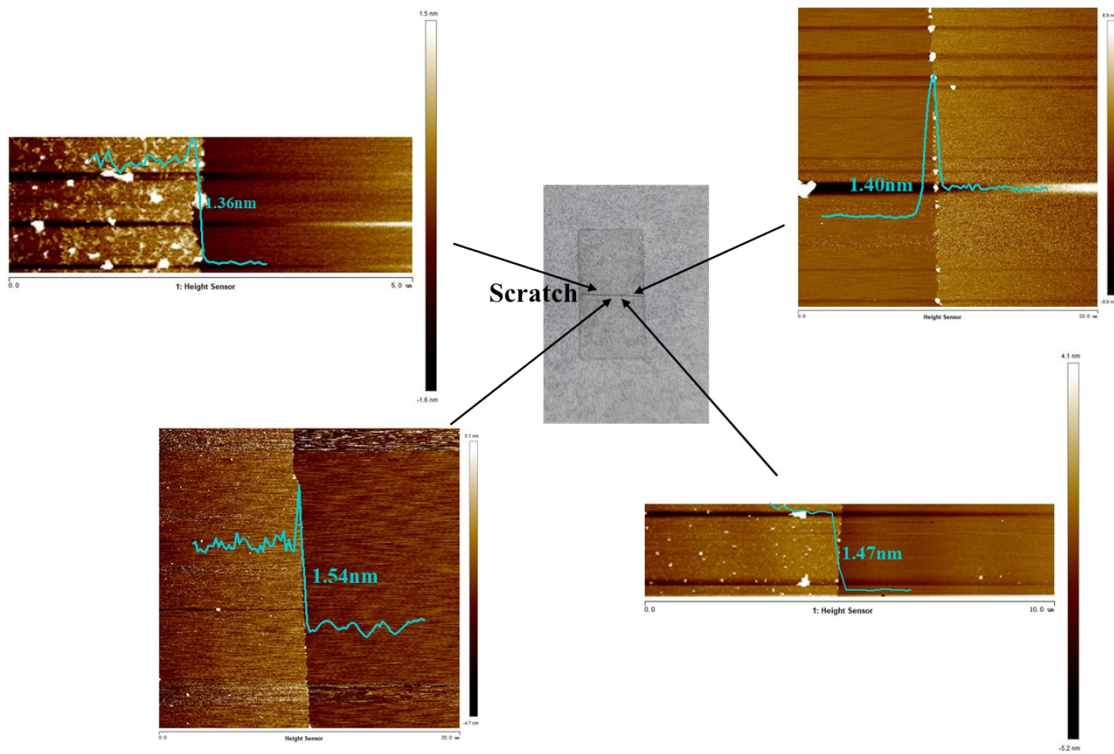

**Figure S3** AFM images of bilayer ReSe<sub>2</sub> films and height profiles in 4 different positions, where steps were formed by deliberately scratching on the films.

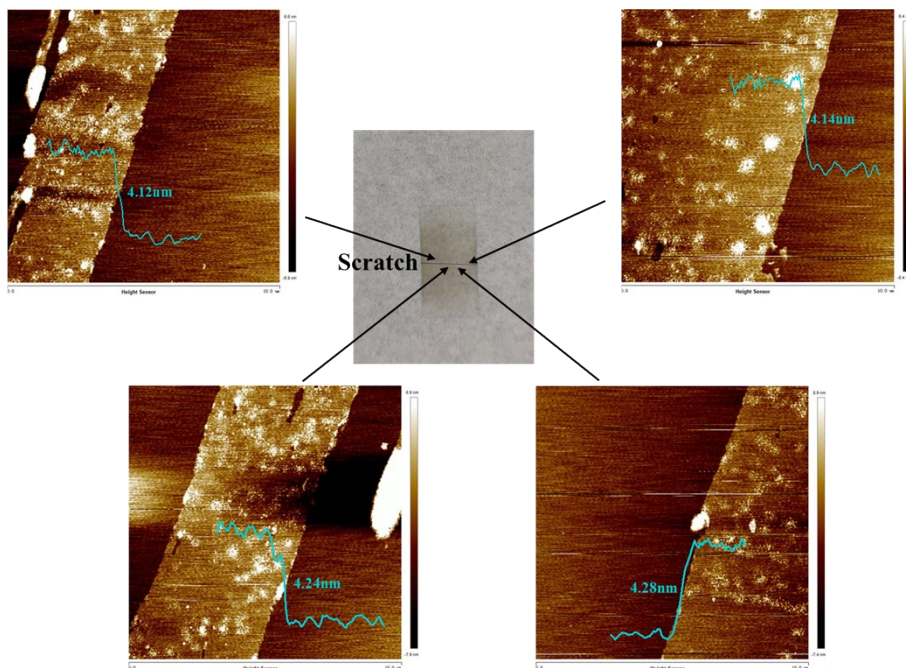

**Figure S4** AFM images of 7-layer ReSe<sub>2</sub> films and height profiles in 4 different positions, where steps were formed by deliberately scratching on the films.

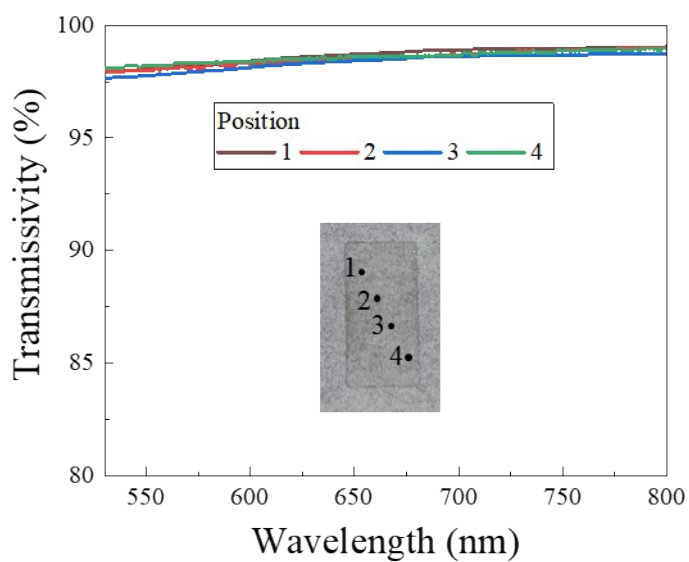

**Figure S5** Transmittance spectra of 4 different positions in the sample along the carrier gas direction.

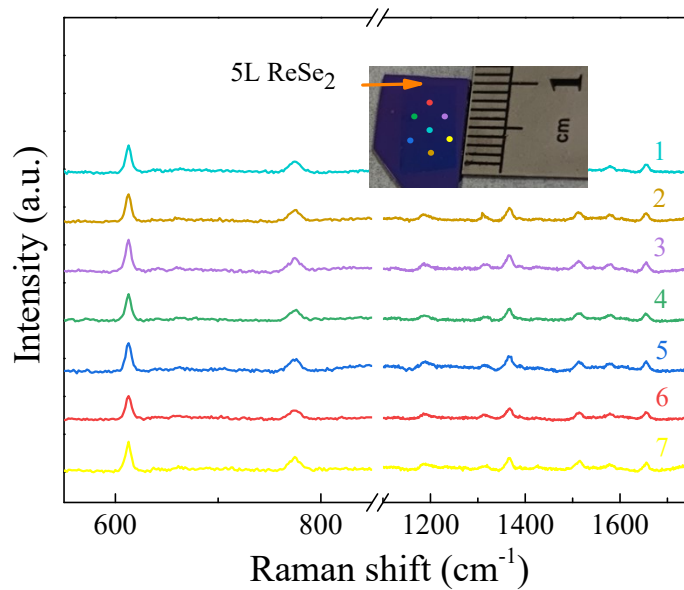

**Figure S6** Raman spectra of  $10^{-5}$  M R6G on 5L ReSe<sub>2</sub> films, which were collected on 7 different spots as shown in the inset with different colors.

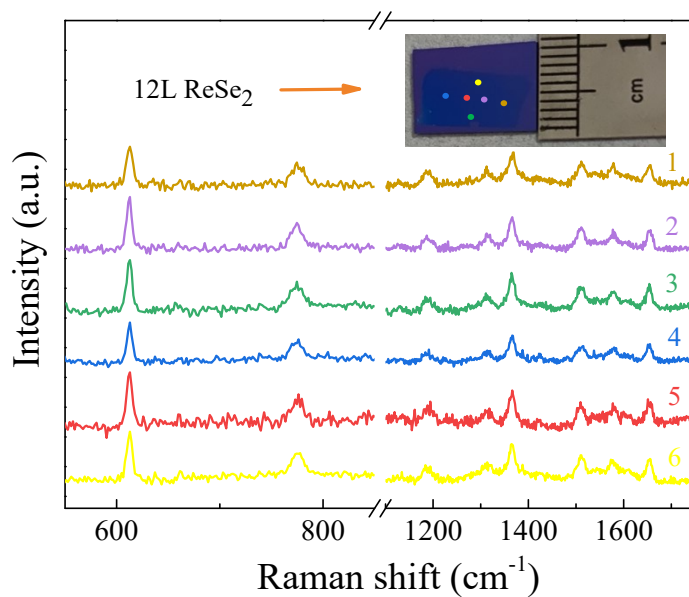

**Figure S7** Raman spectra of  $10^{-5}$  M R6G on 12L ReSe<sub>2</sub> films, which were collected on 6 different spots as shown in the inset with different colors.

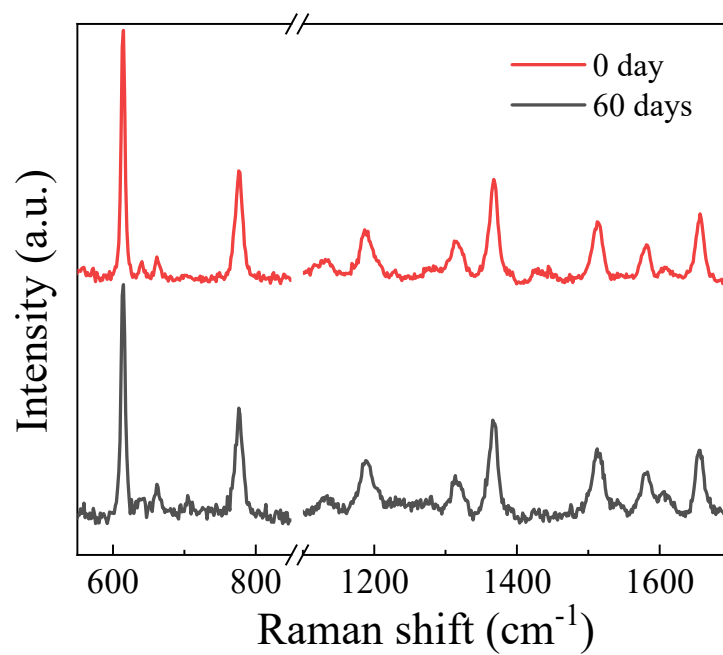

**Figure S8** Raman spectra of R6G on 1L ReSe<sub>2</sub> film after exposure in the air for 60 days.

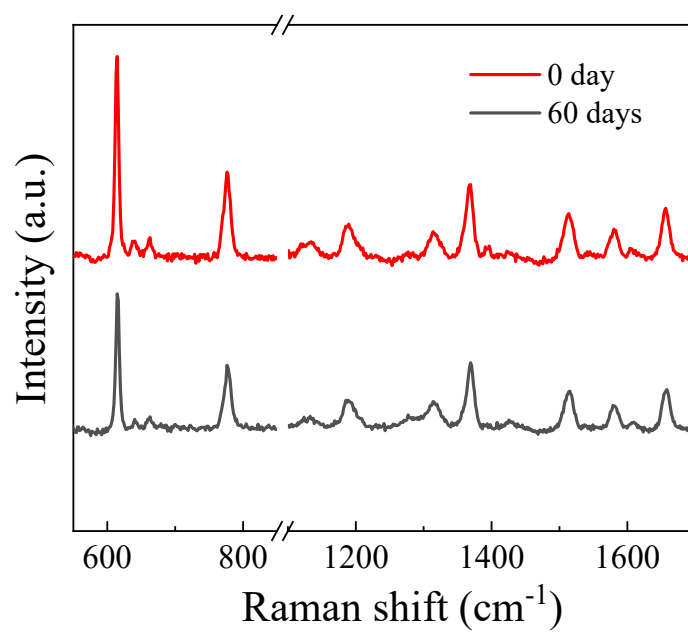

**Figure S9** Raman spectra of R6G on 4L ReSe<sub>2</sub> film after exposure in the air for 60 days.

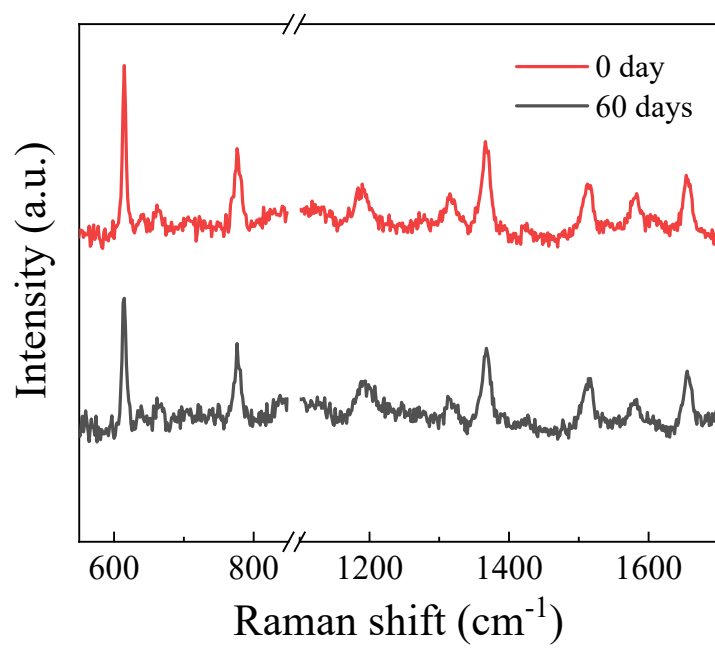

**Figure S10** Raman spectra of R6G on 10L ReSe<sub>2</sub> film after exposure in the air for 60 days.
